# Supplementary material
Source: PubMed Central journal article supplement (PMC1352168)

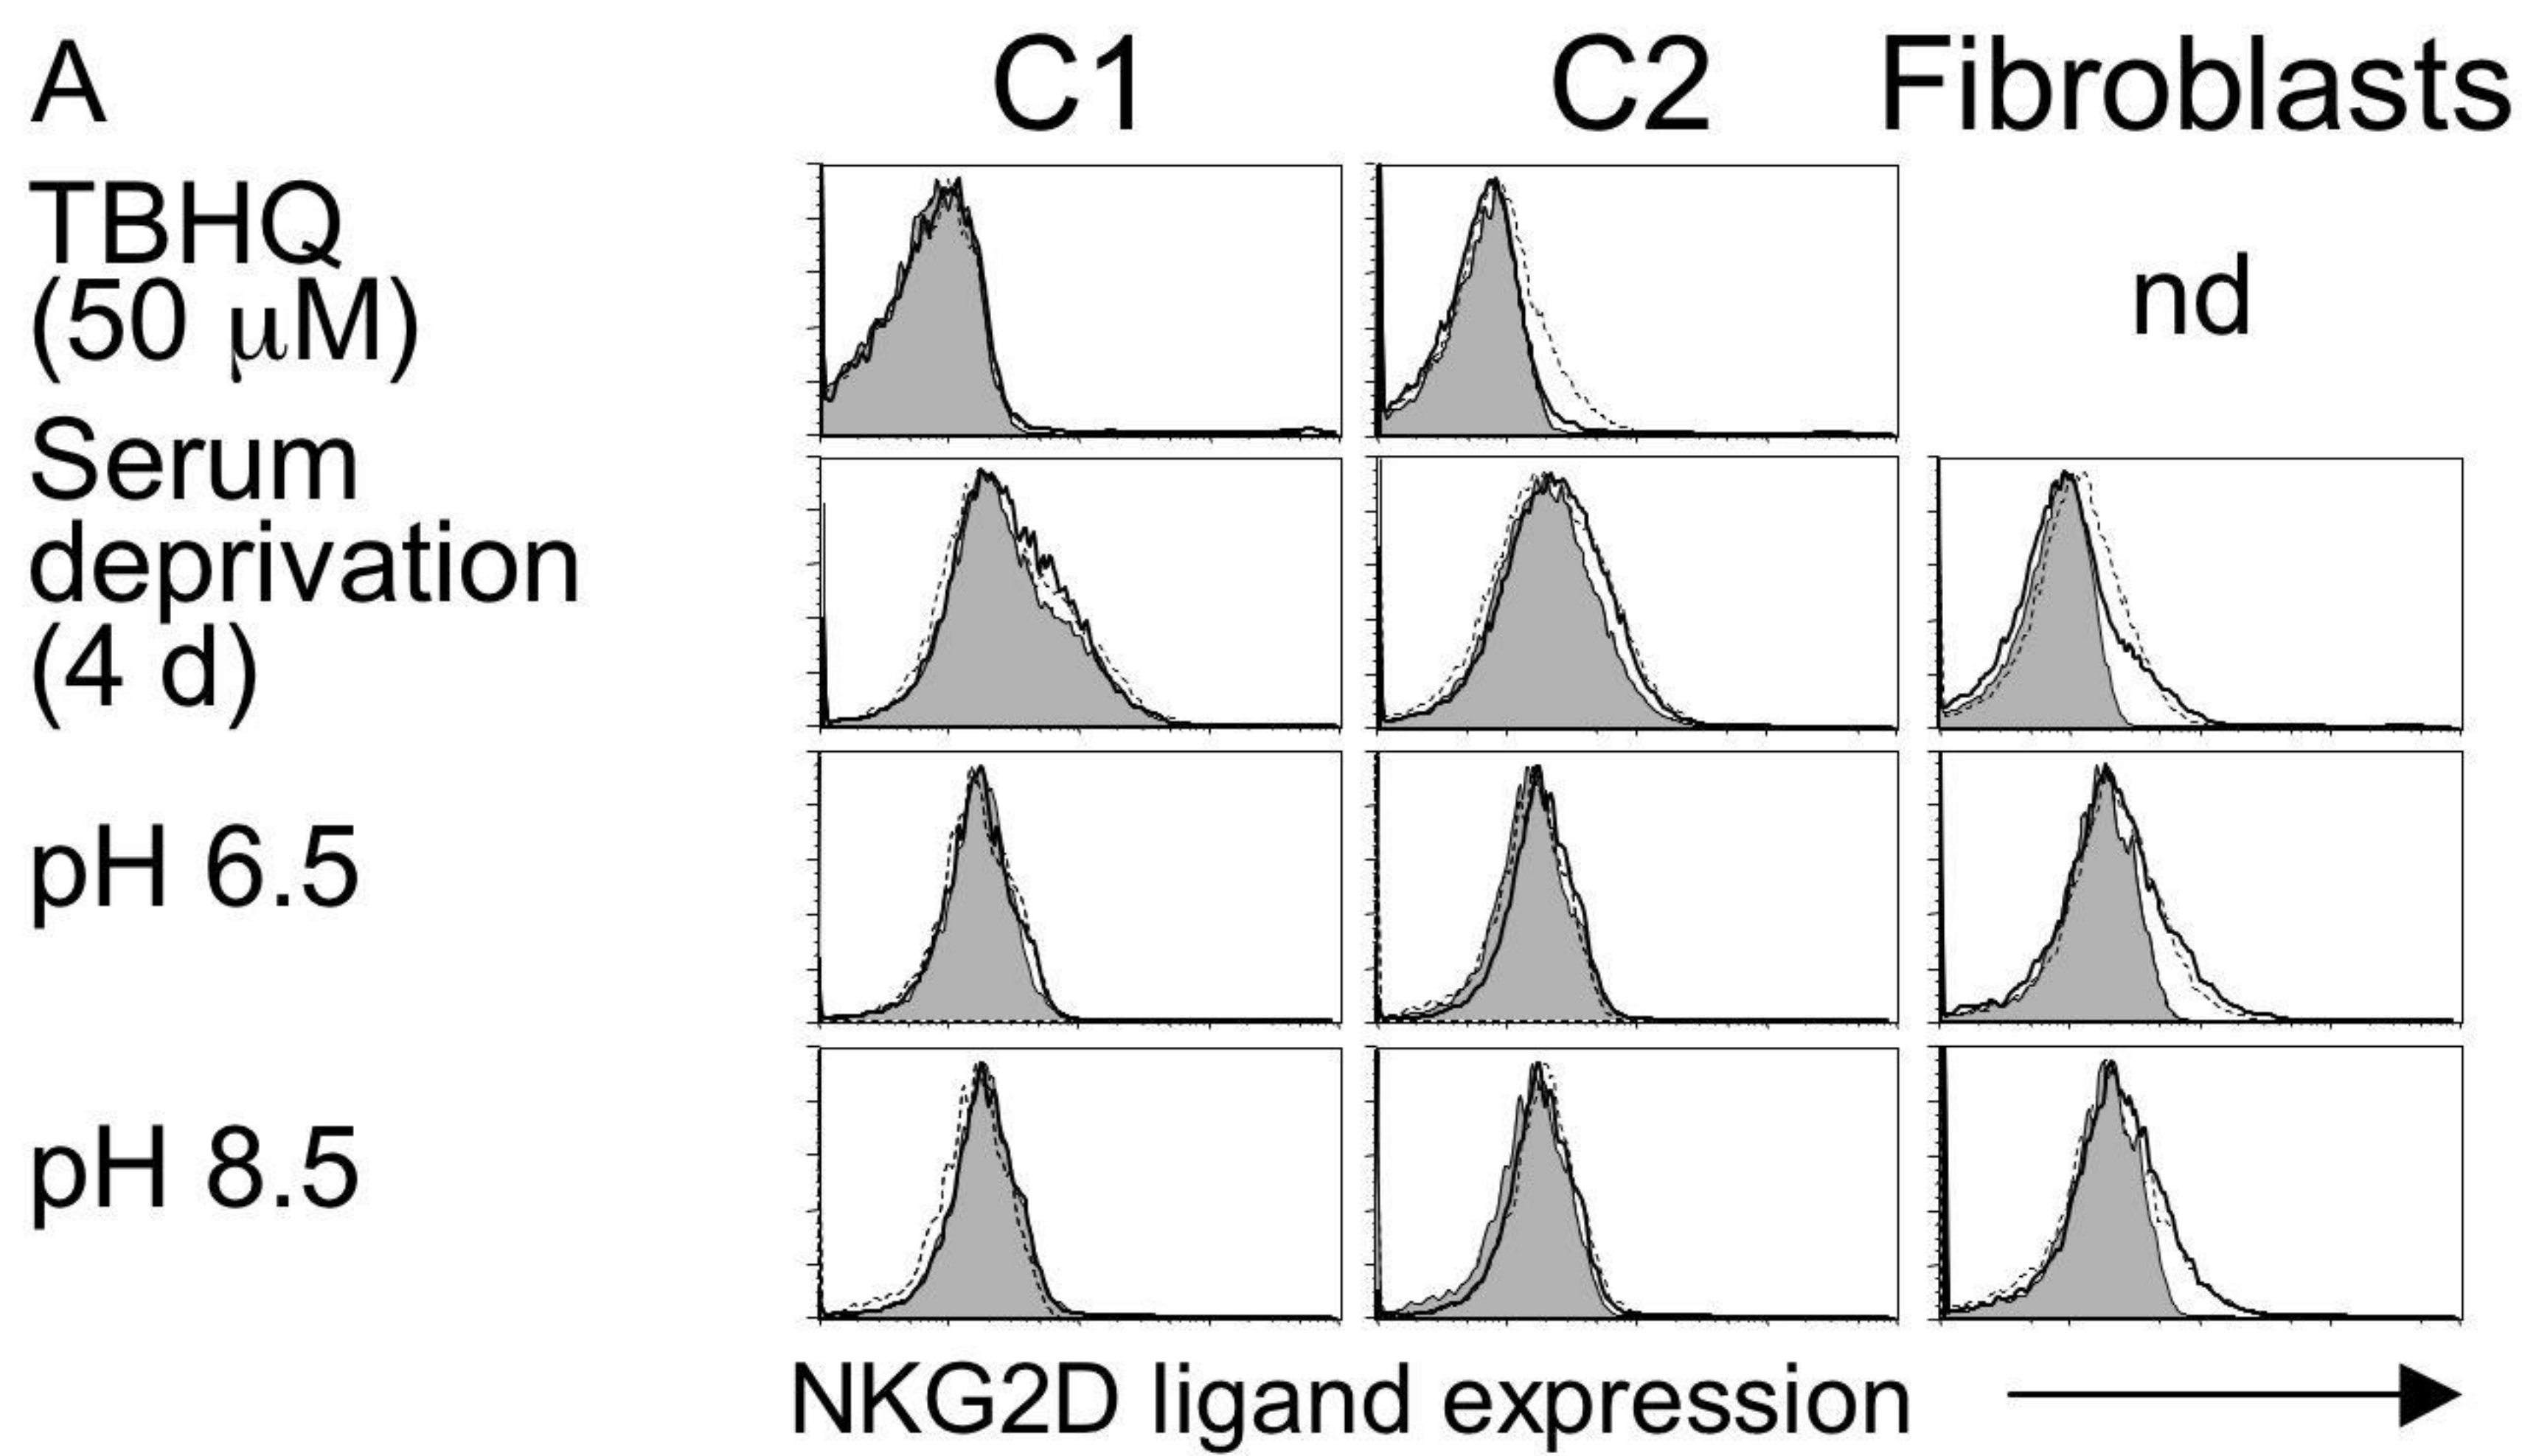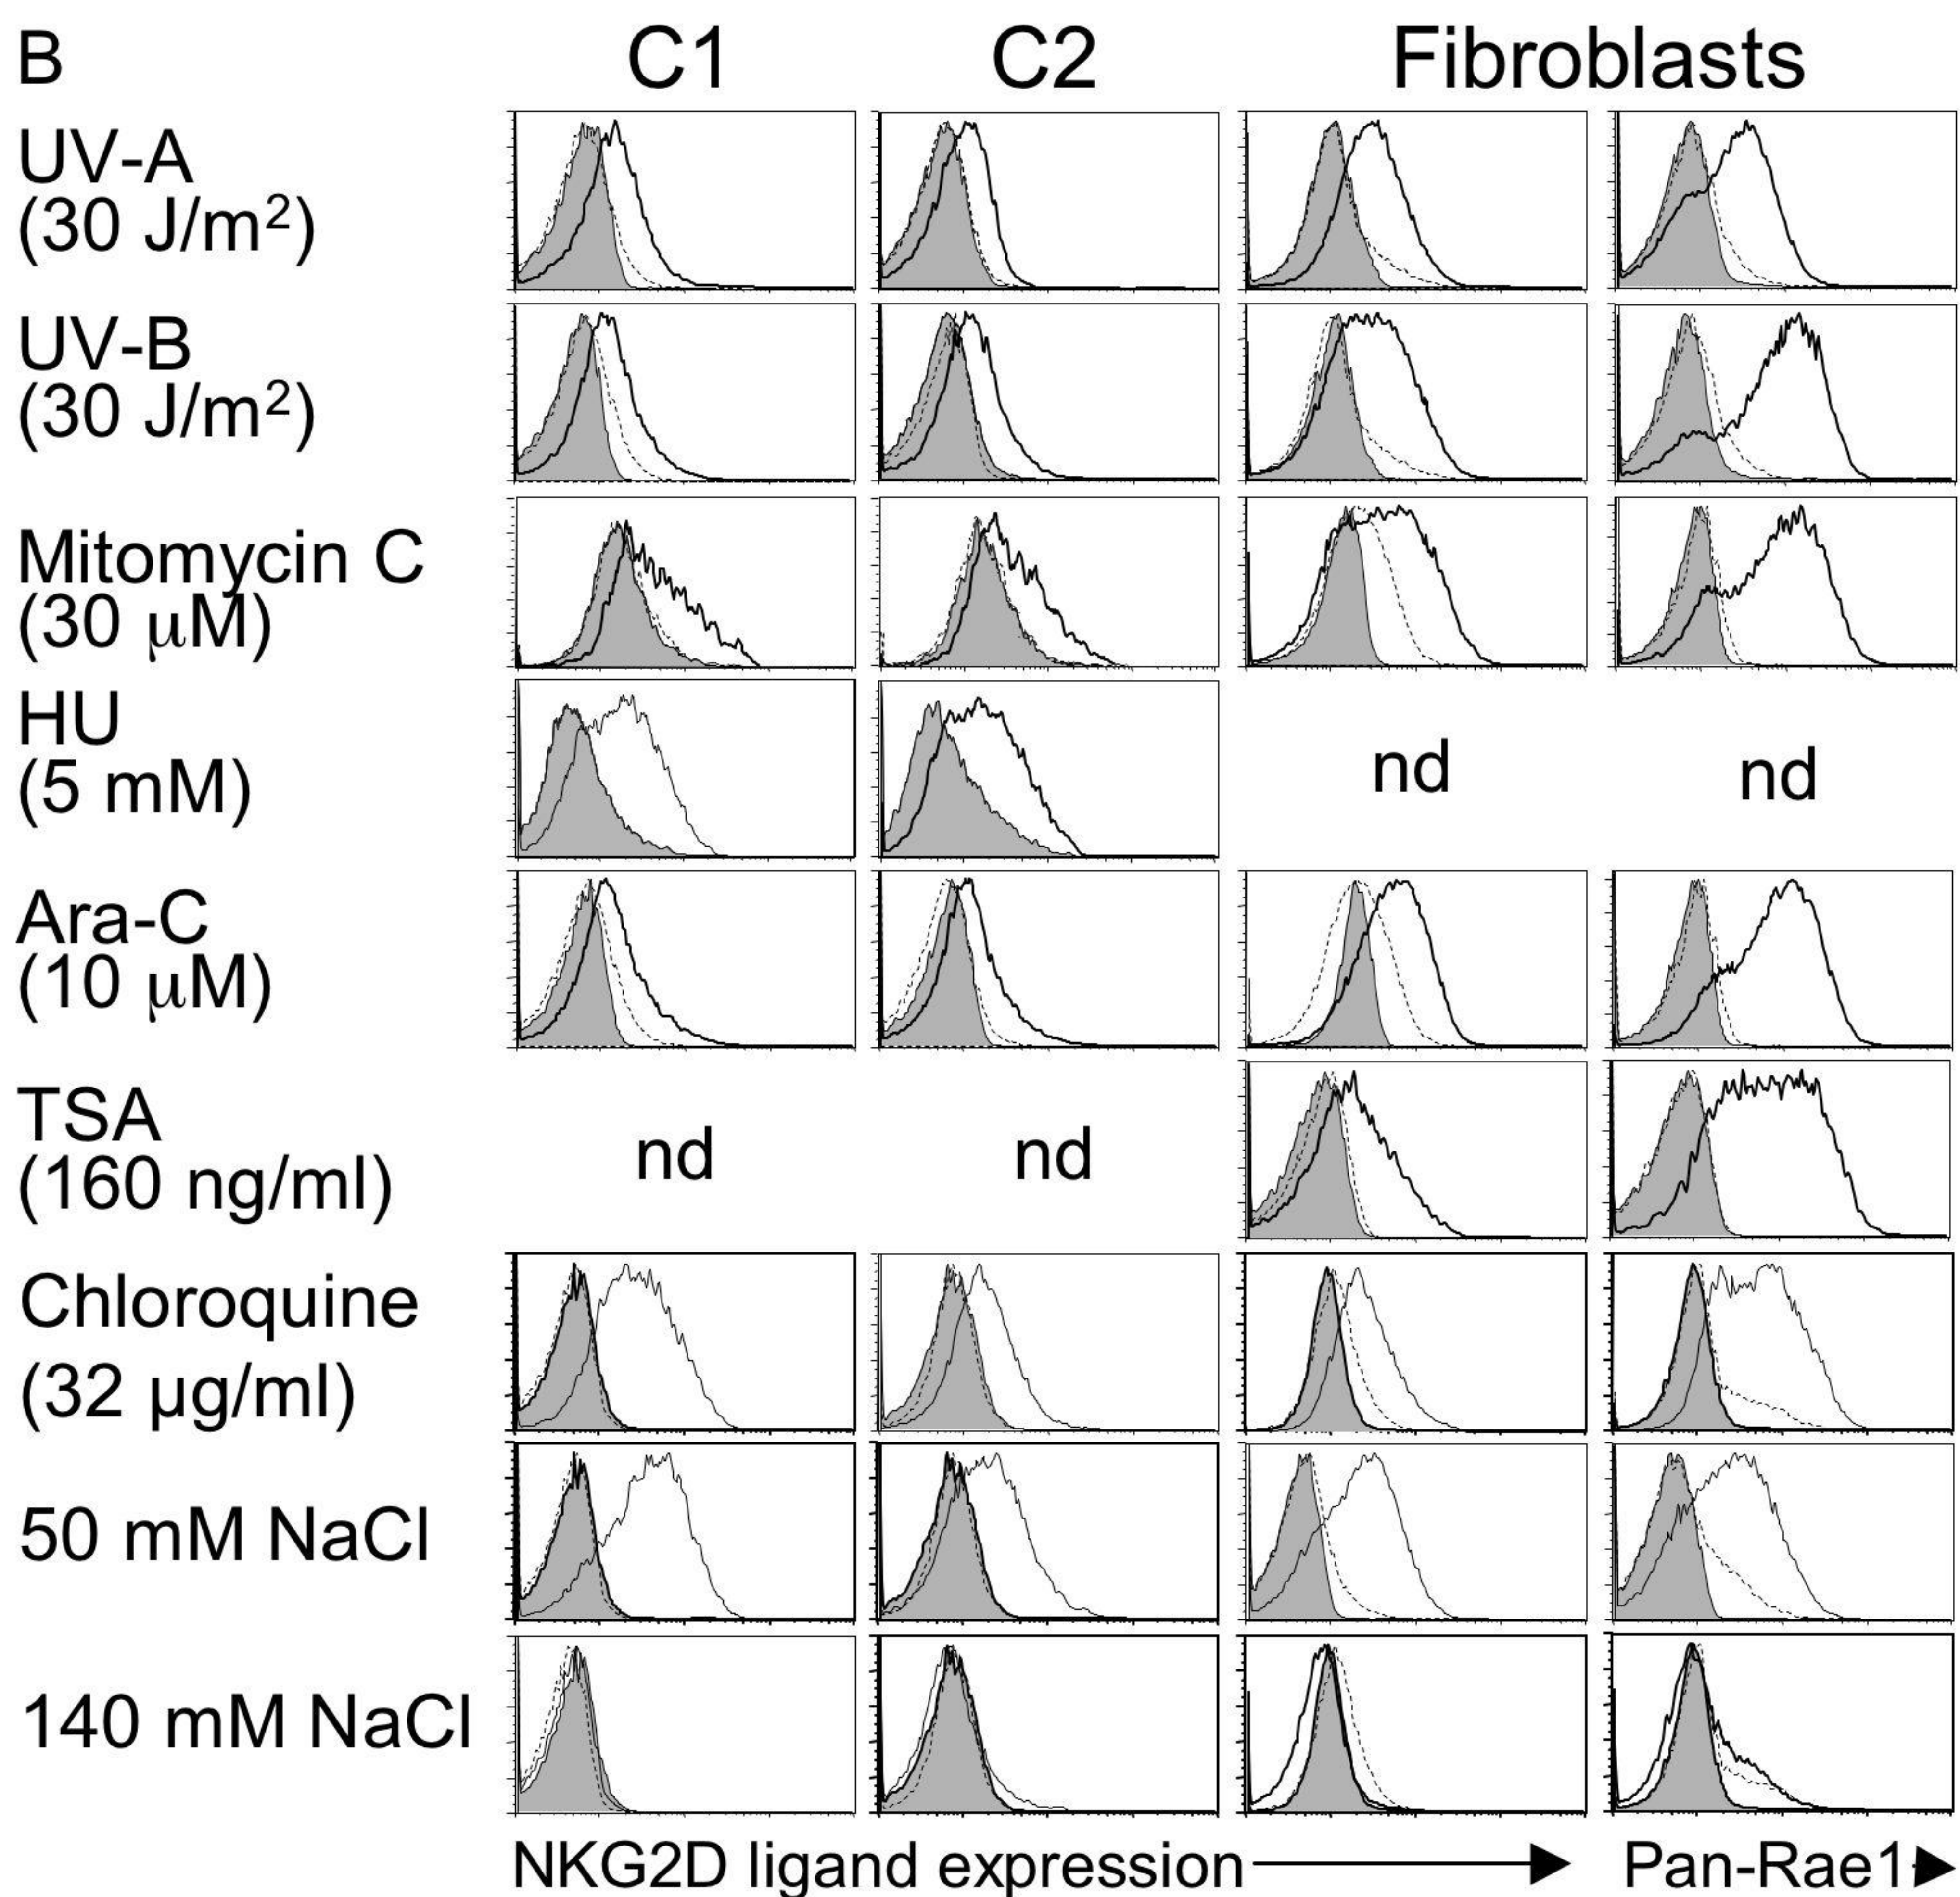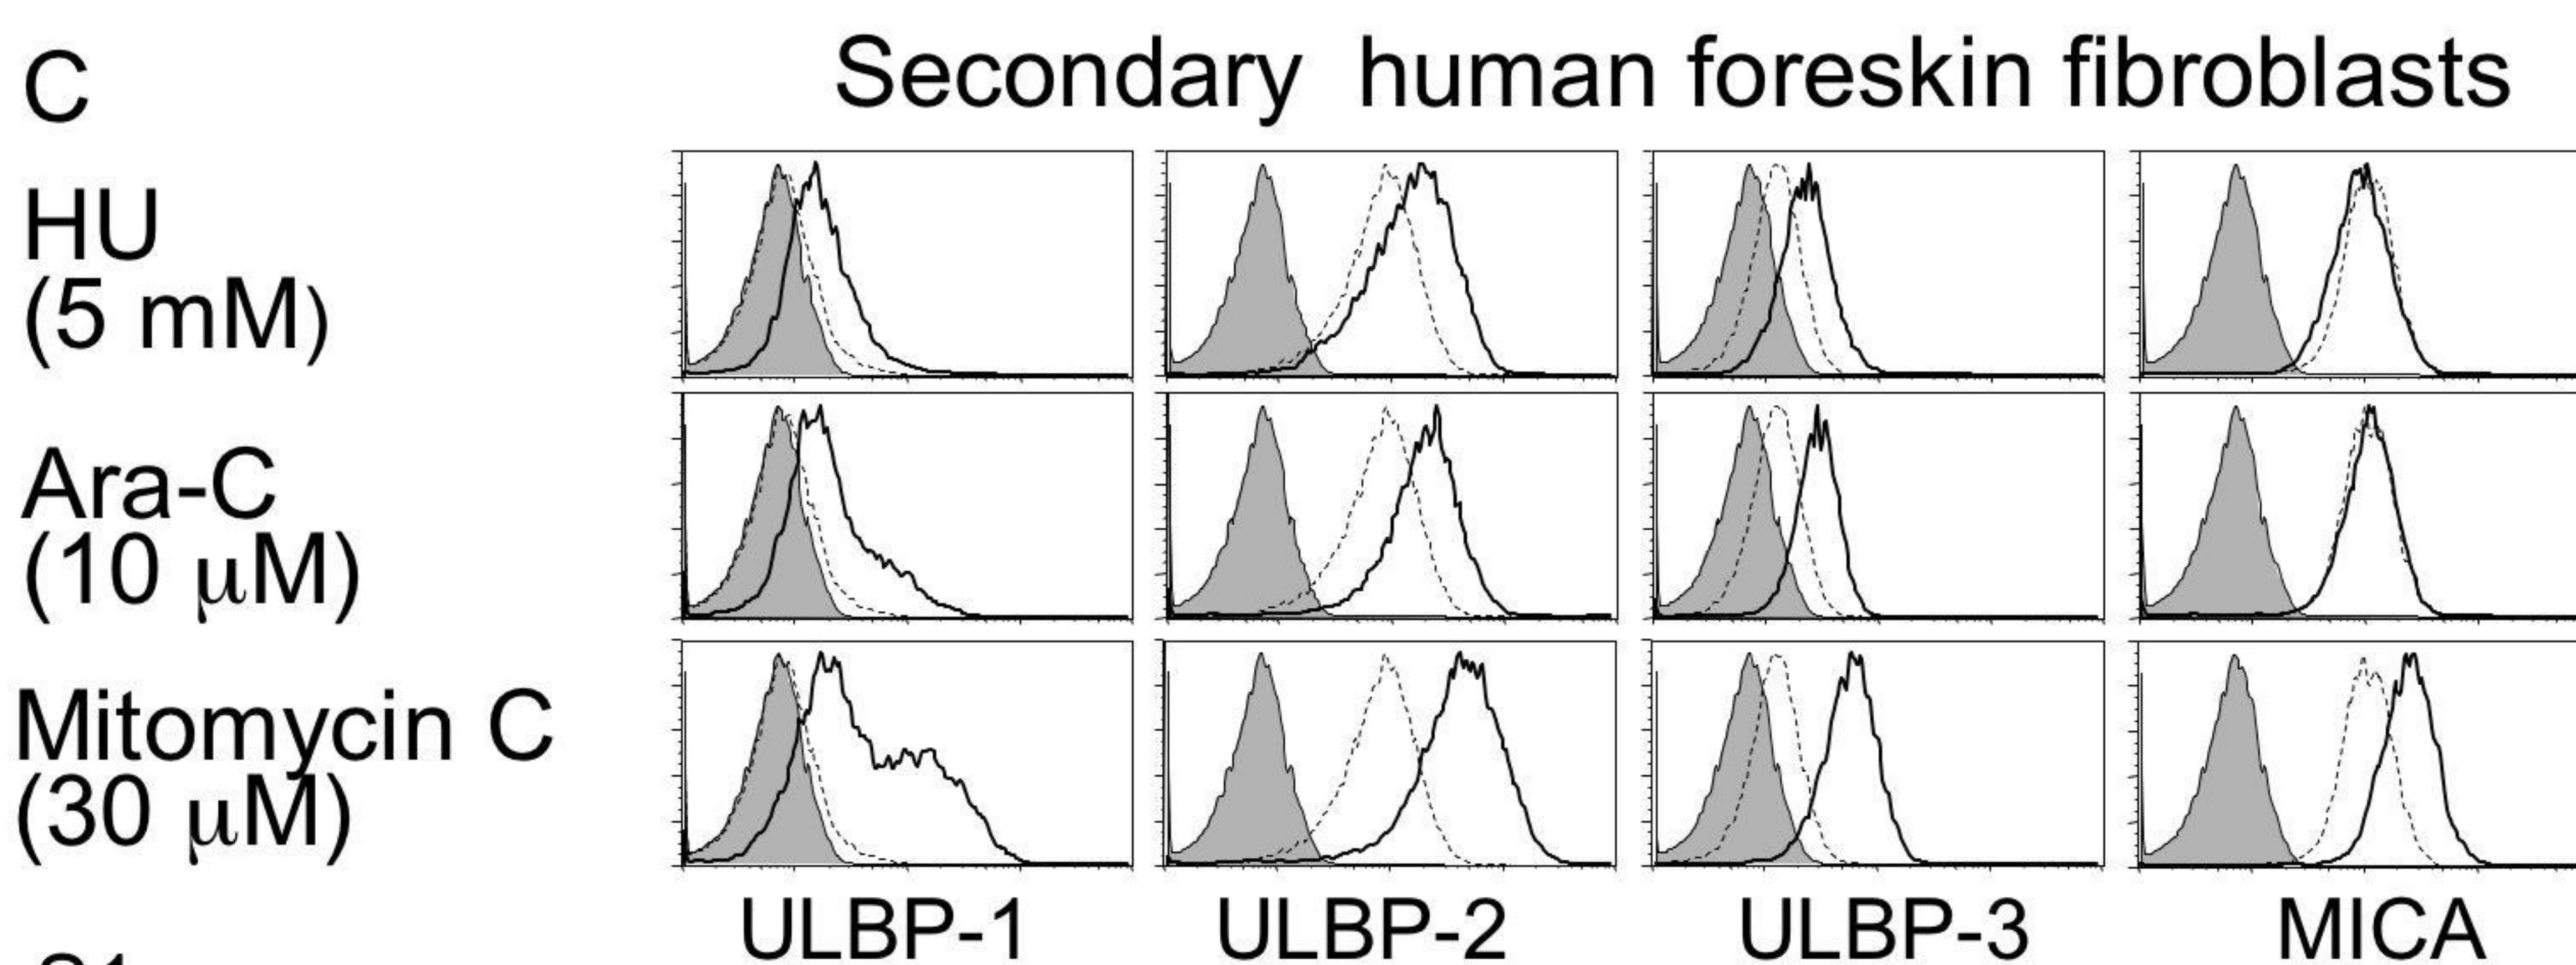

Supplement: NIHMS4767-supplement-SFIG1.pdf [file NIHMS4767-supplement-SFIG1.pdf]

**A****C1**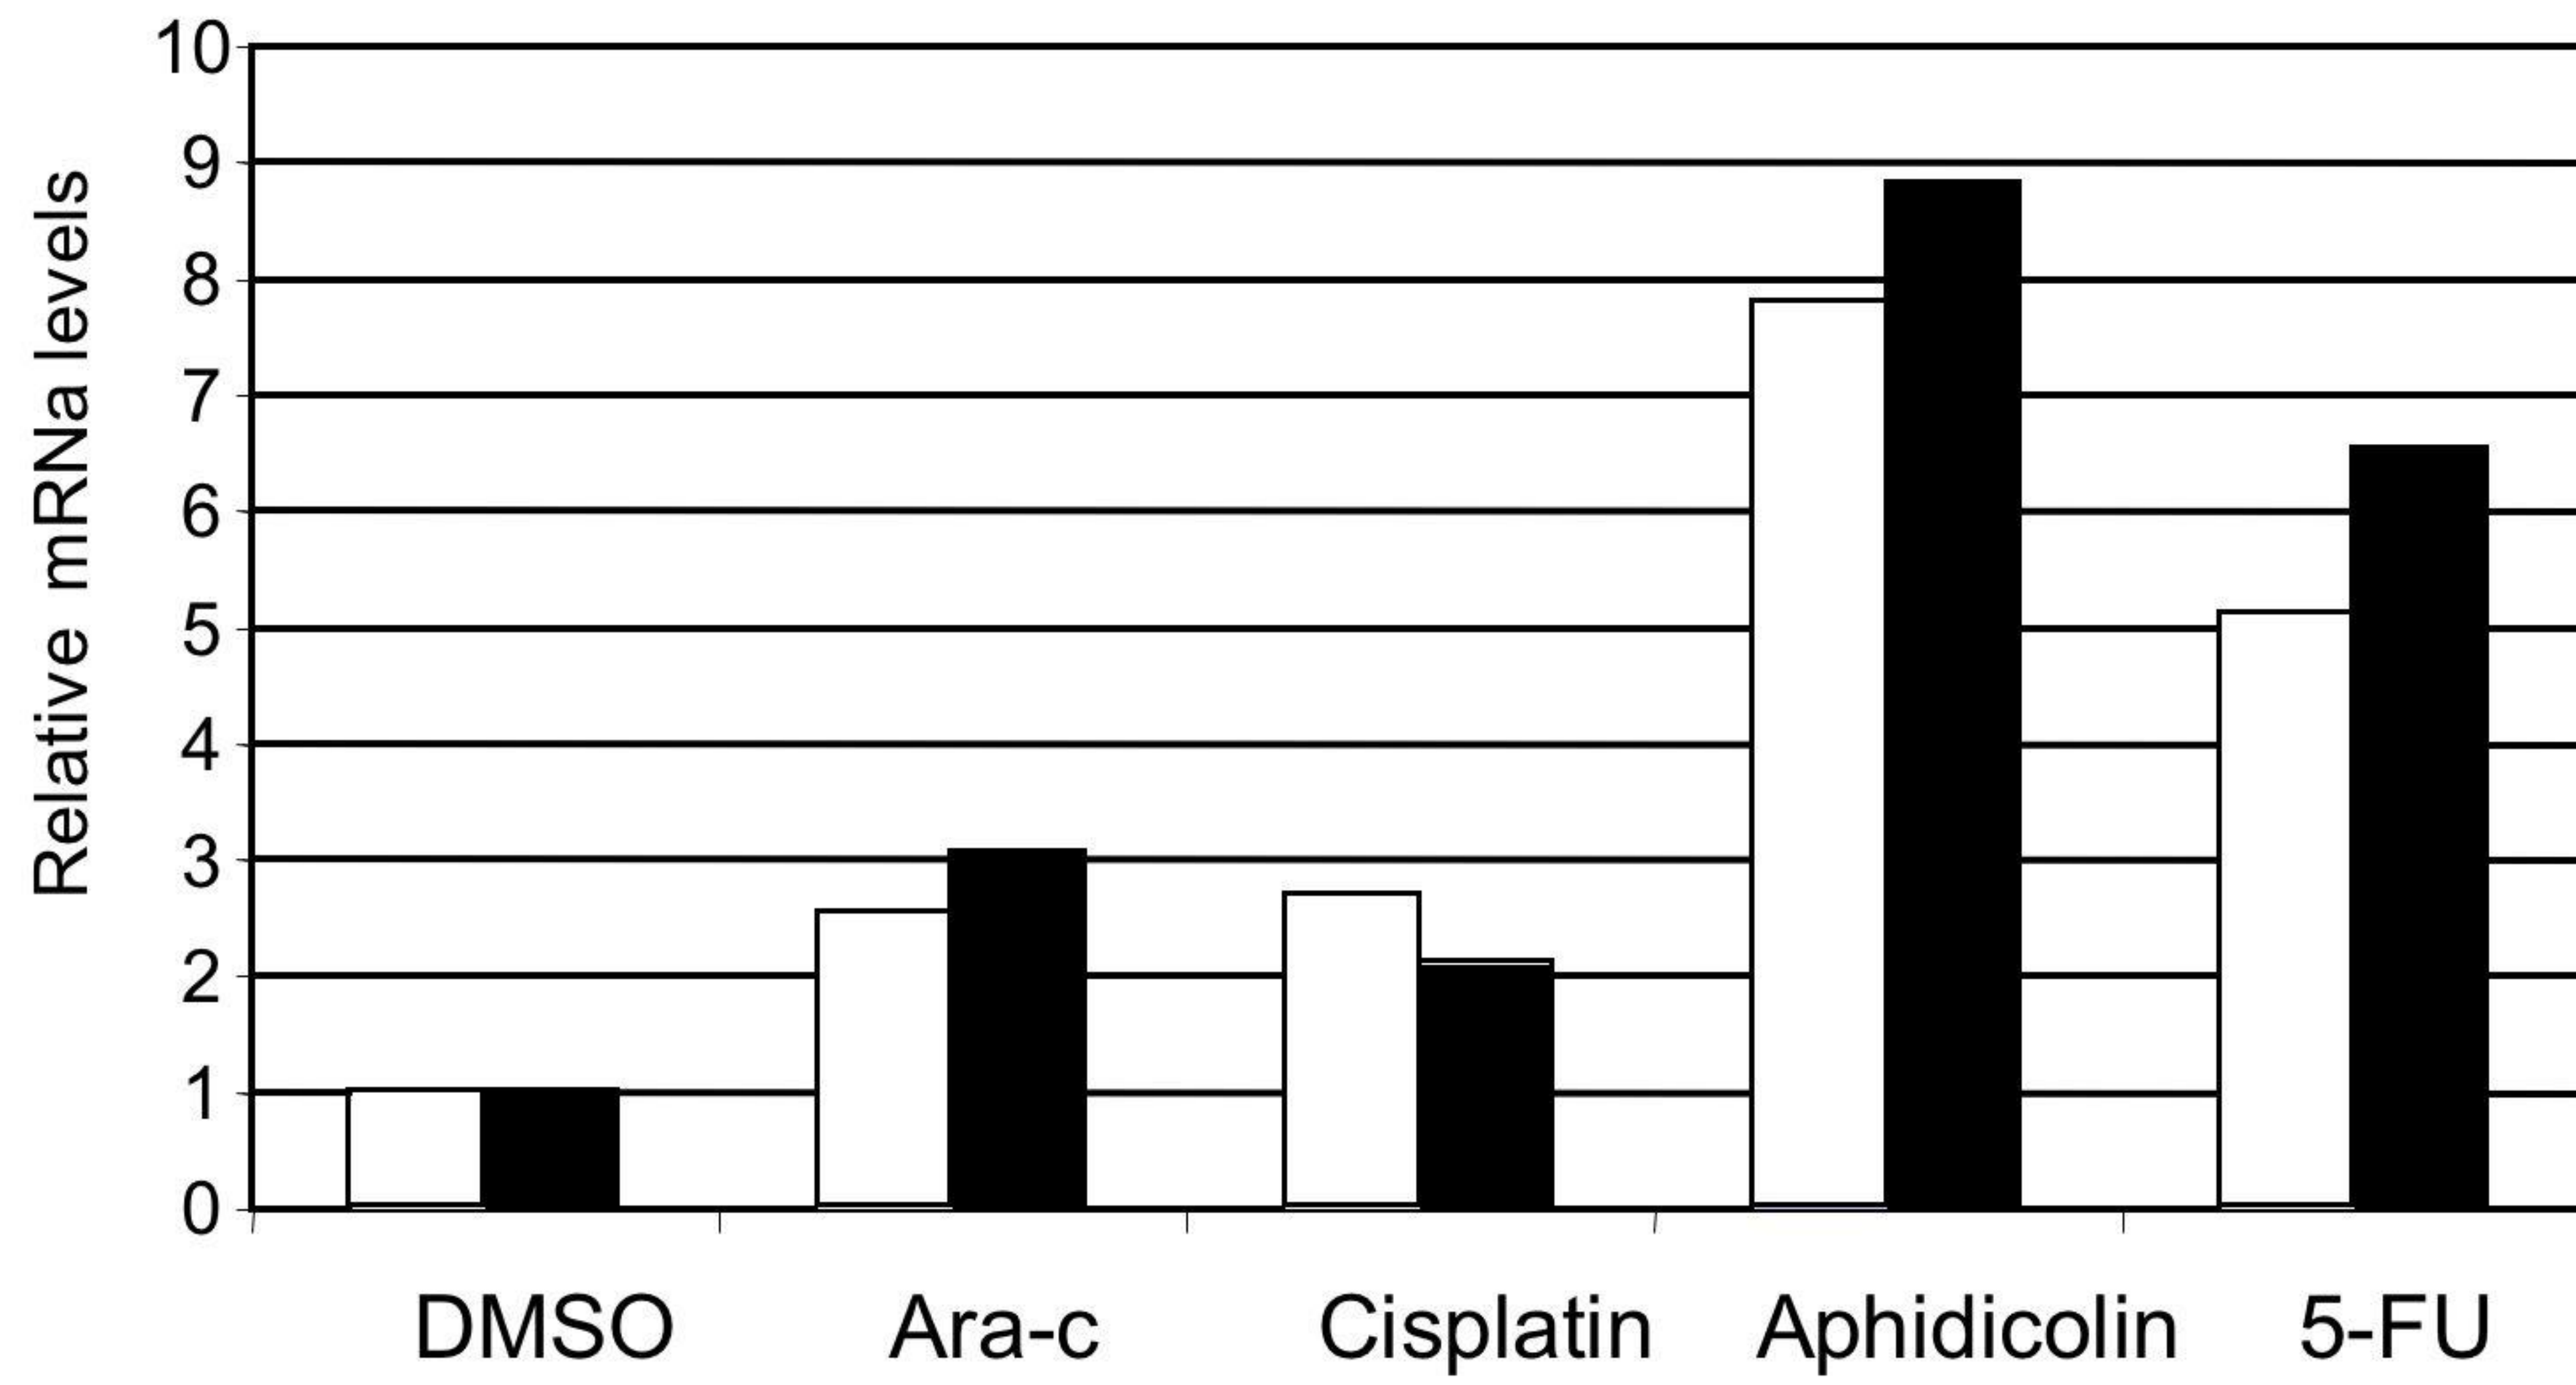**C2**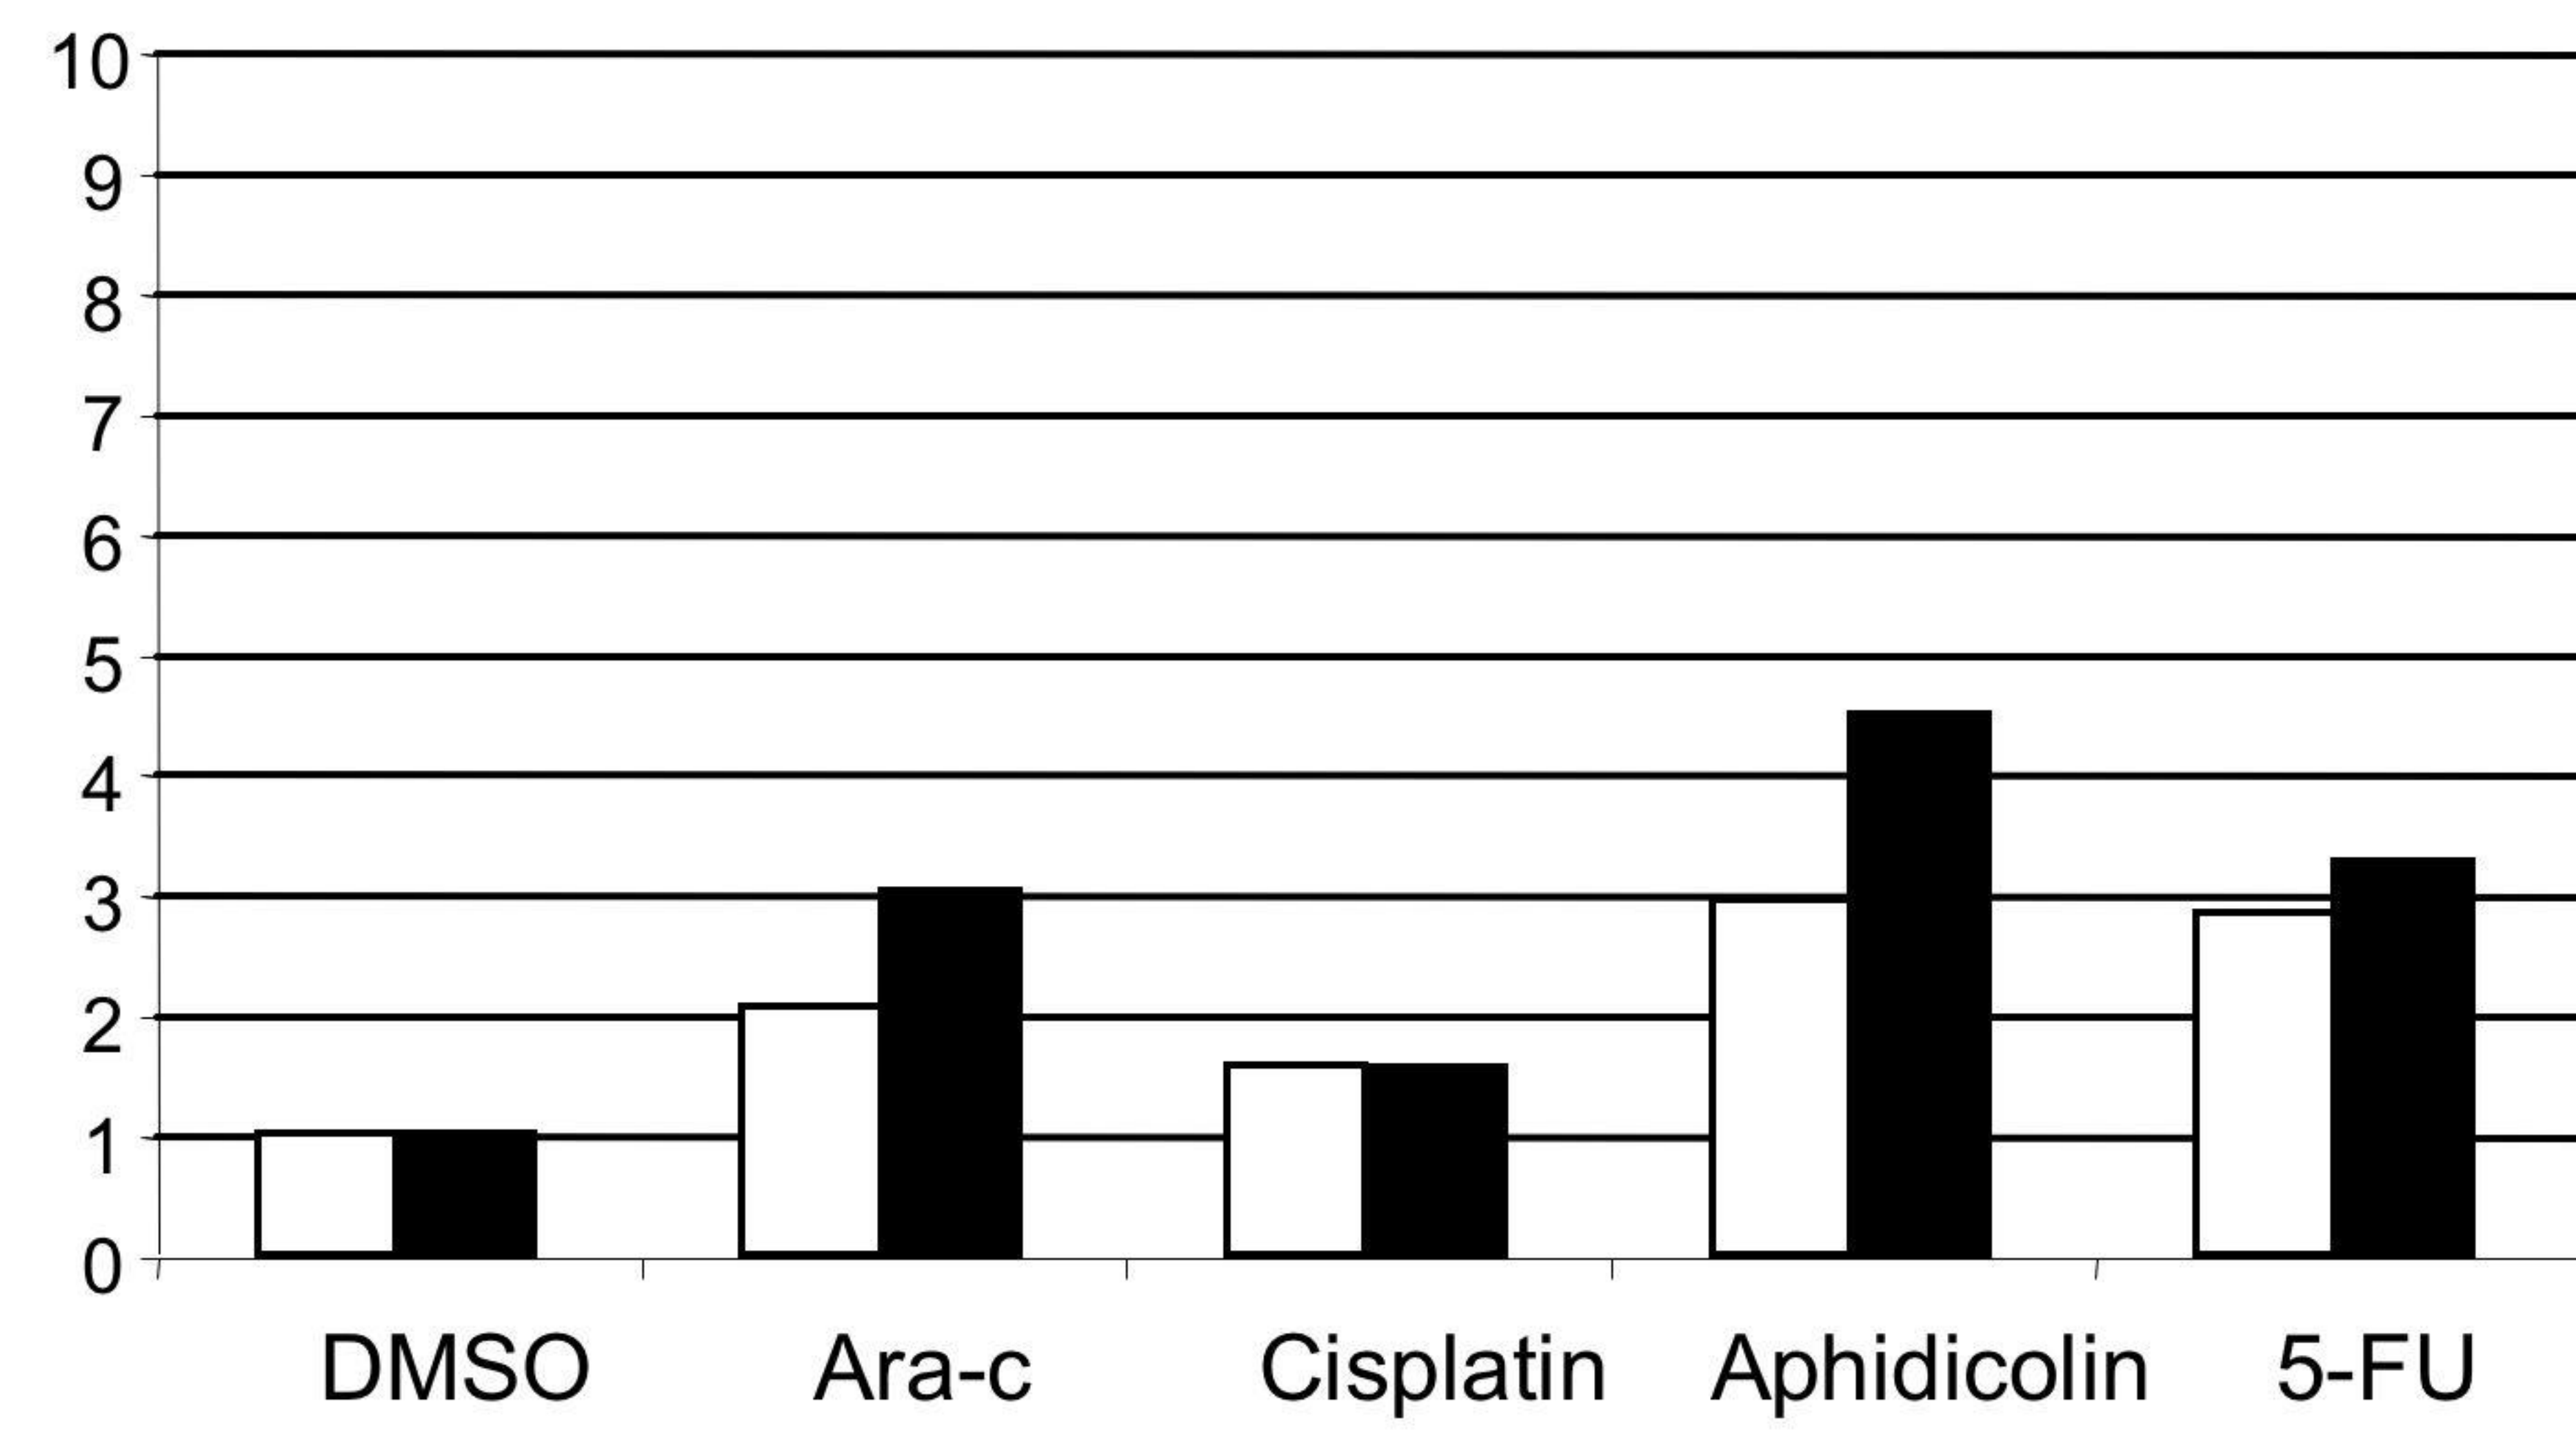**B****Ear fibroblasts**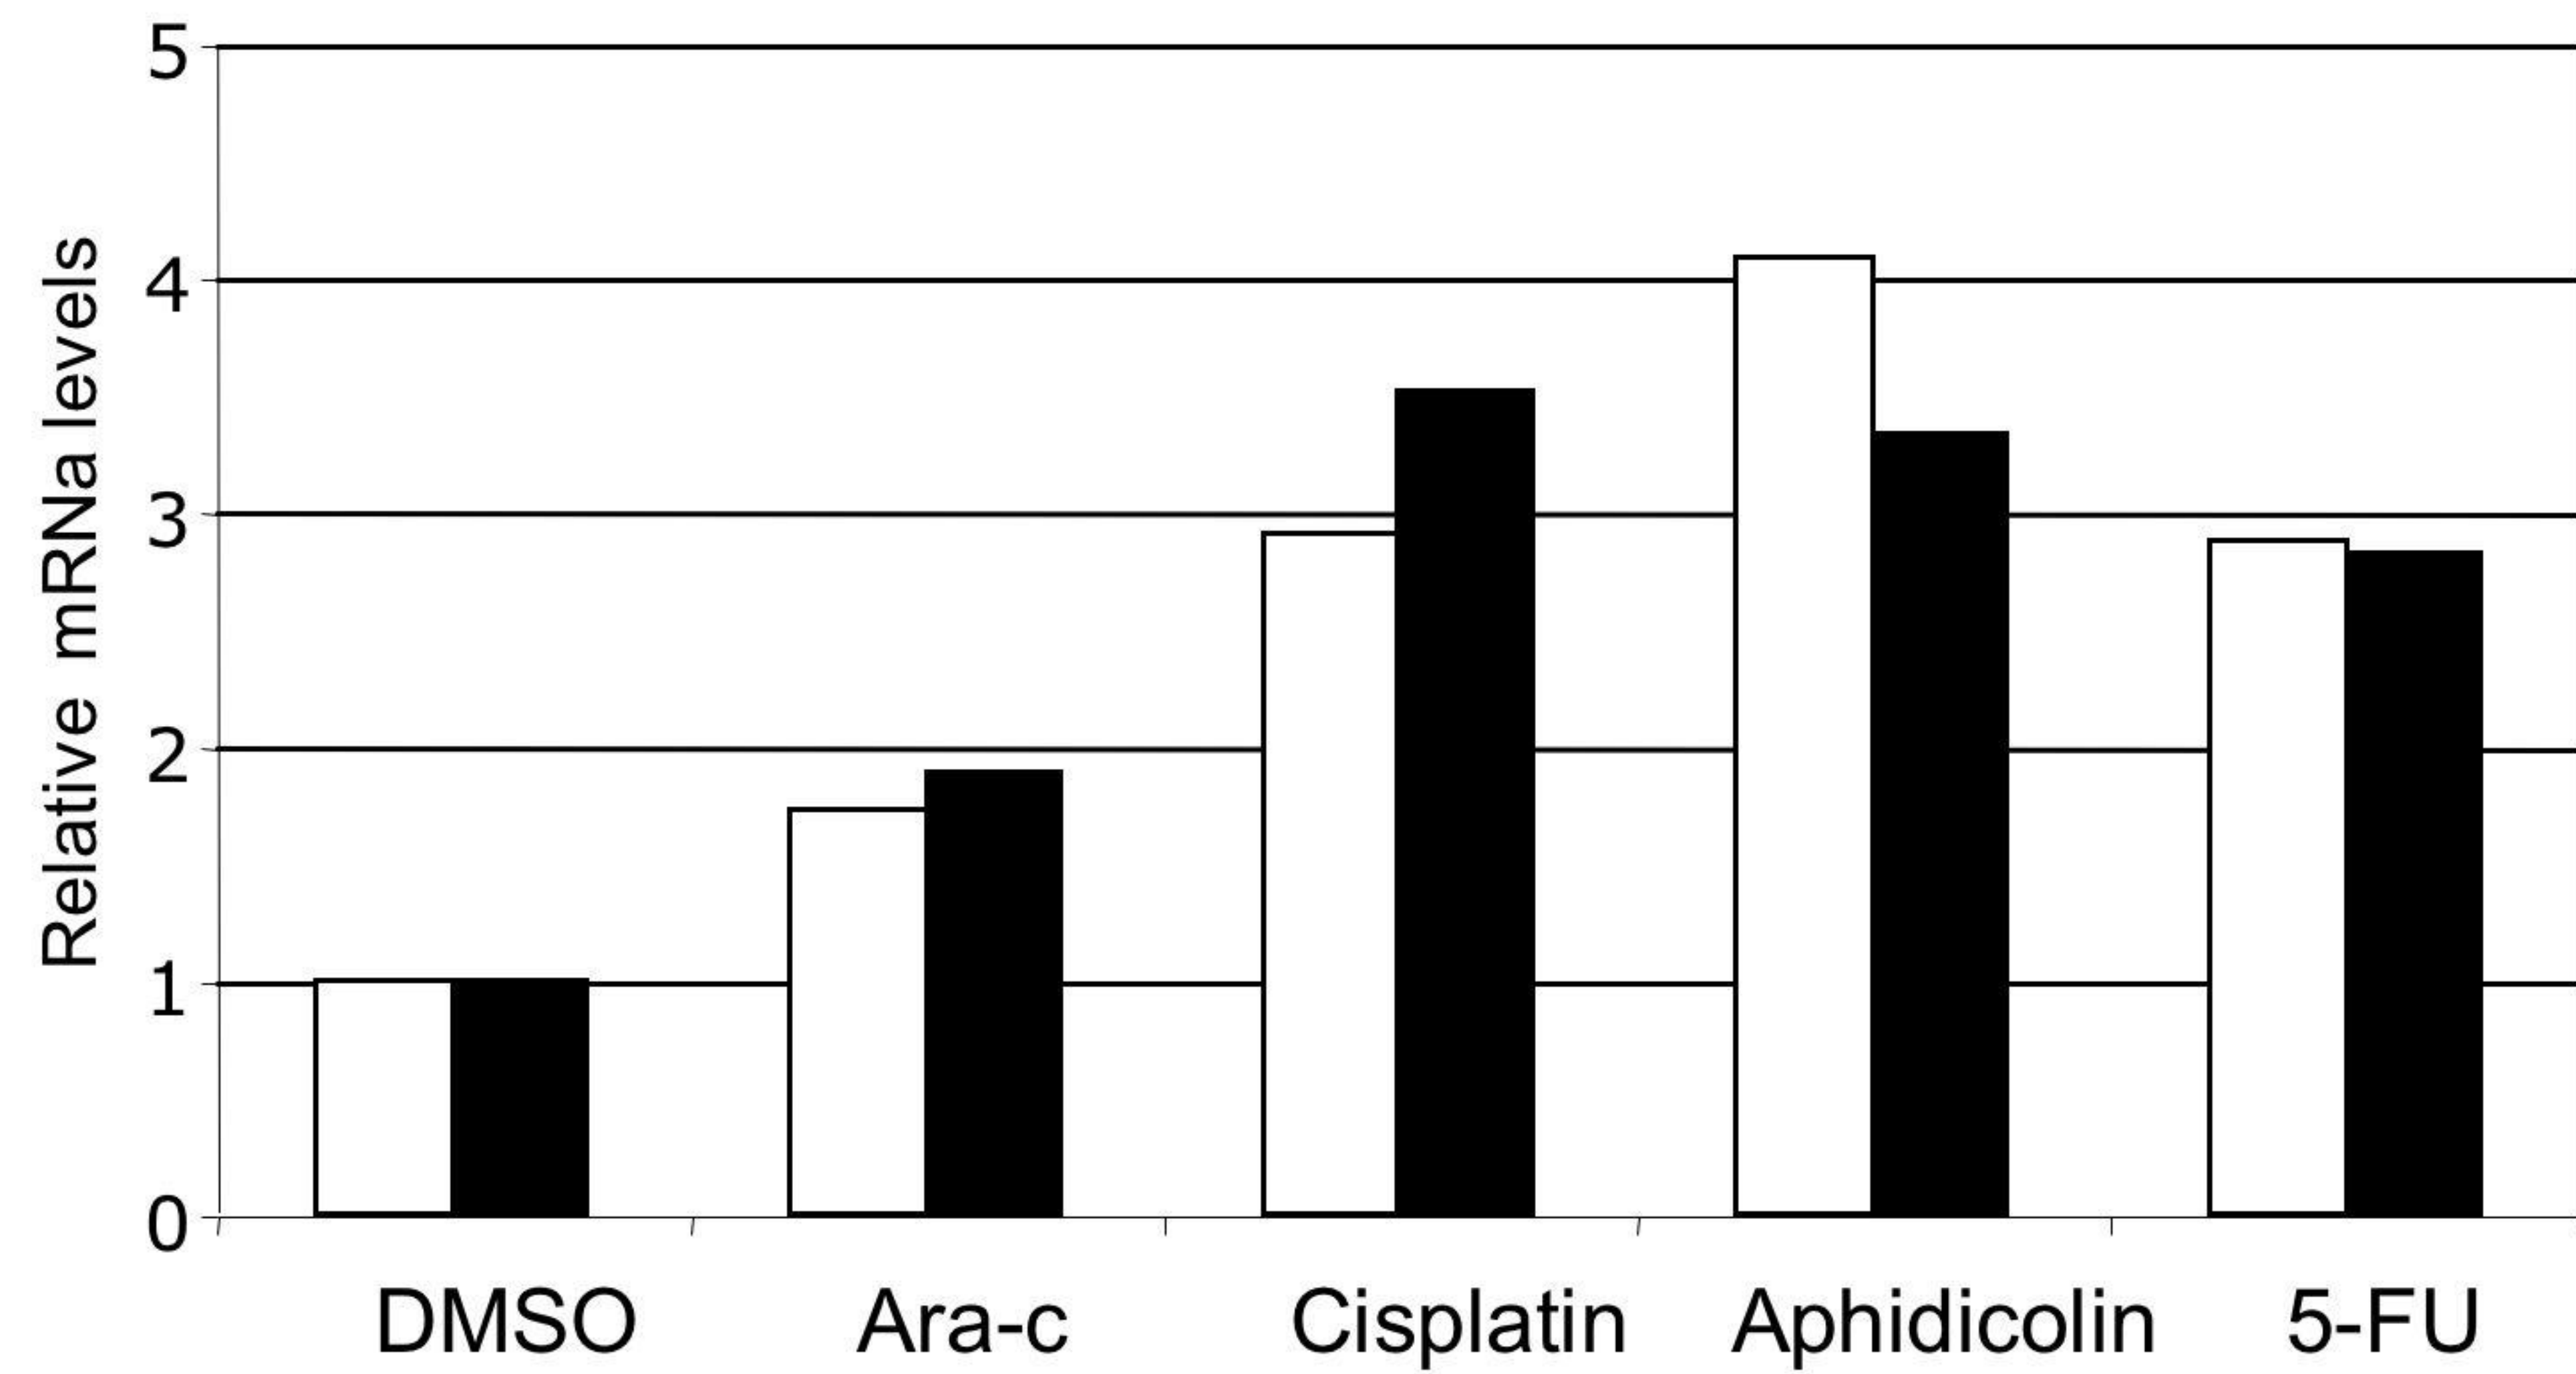**Tail fibroblasts**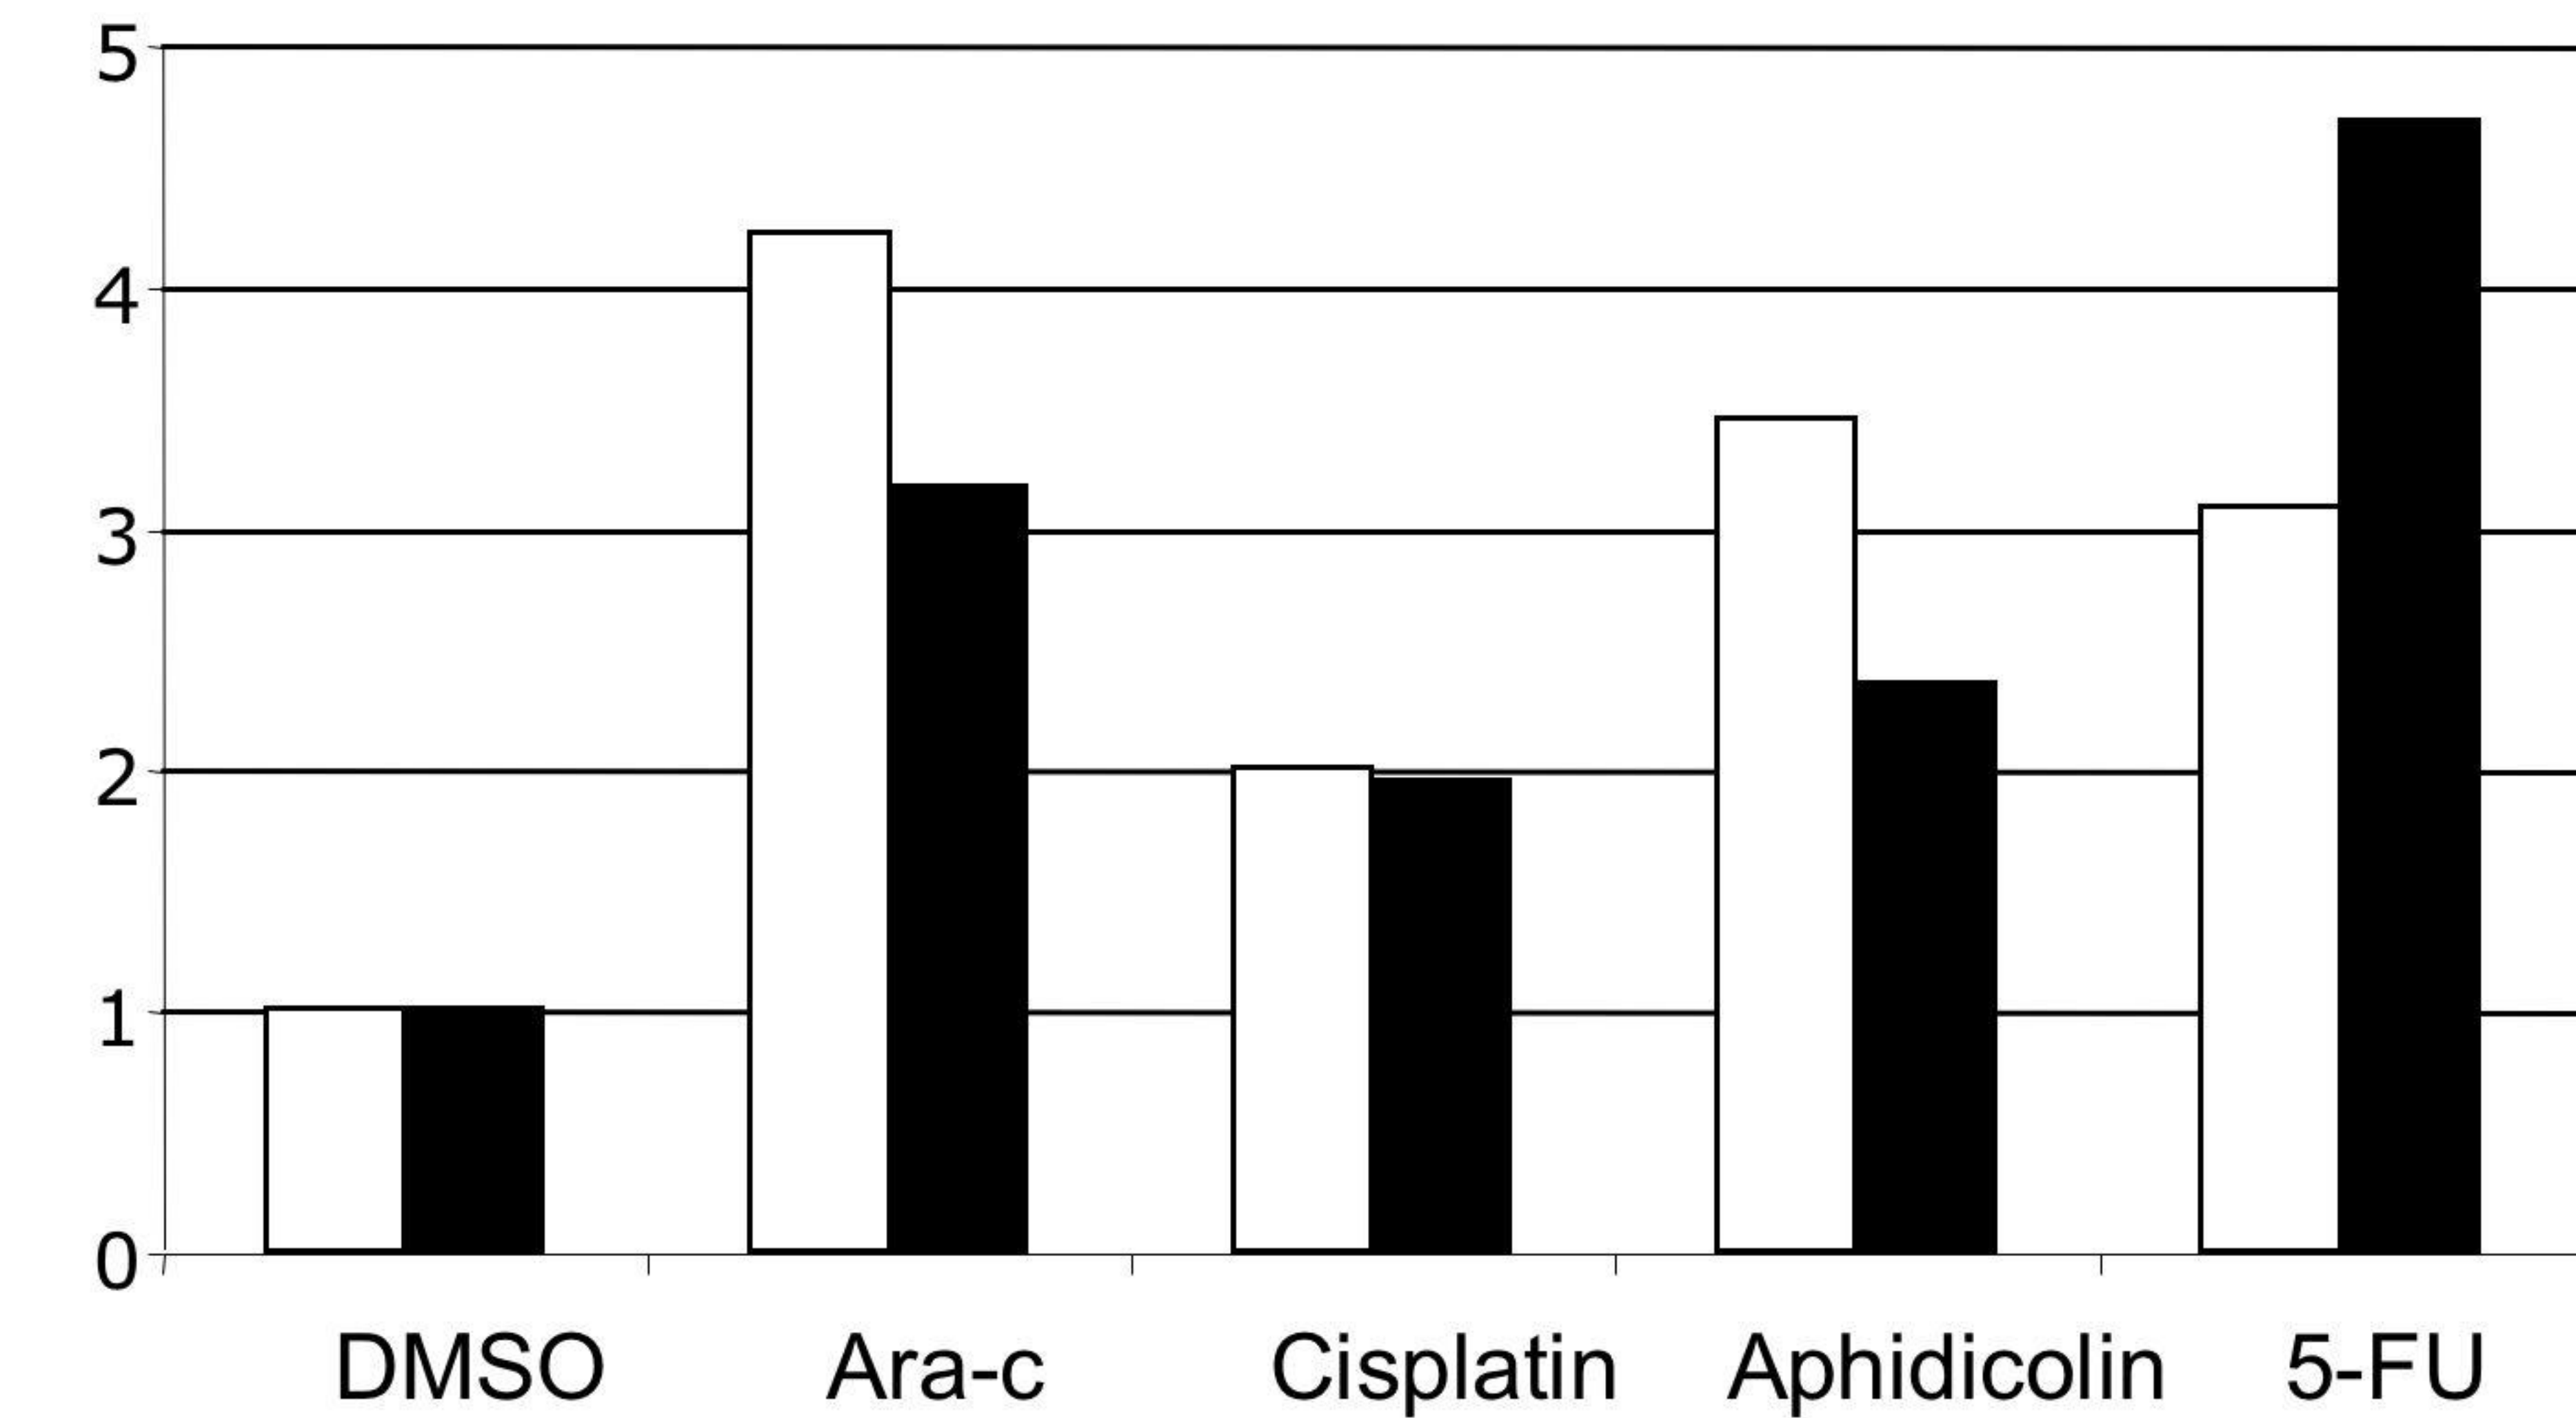

Supplement: NIHMS4767-supplement-SFIG2.pdf [file NIHMS4767-supplement-SFIG2.pdf]

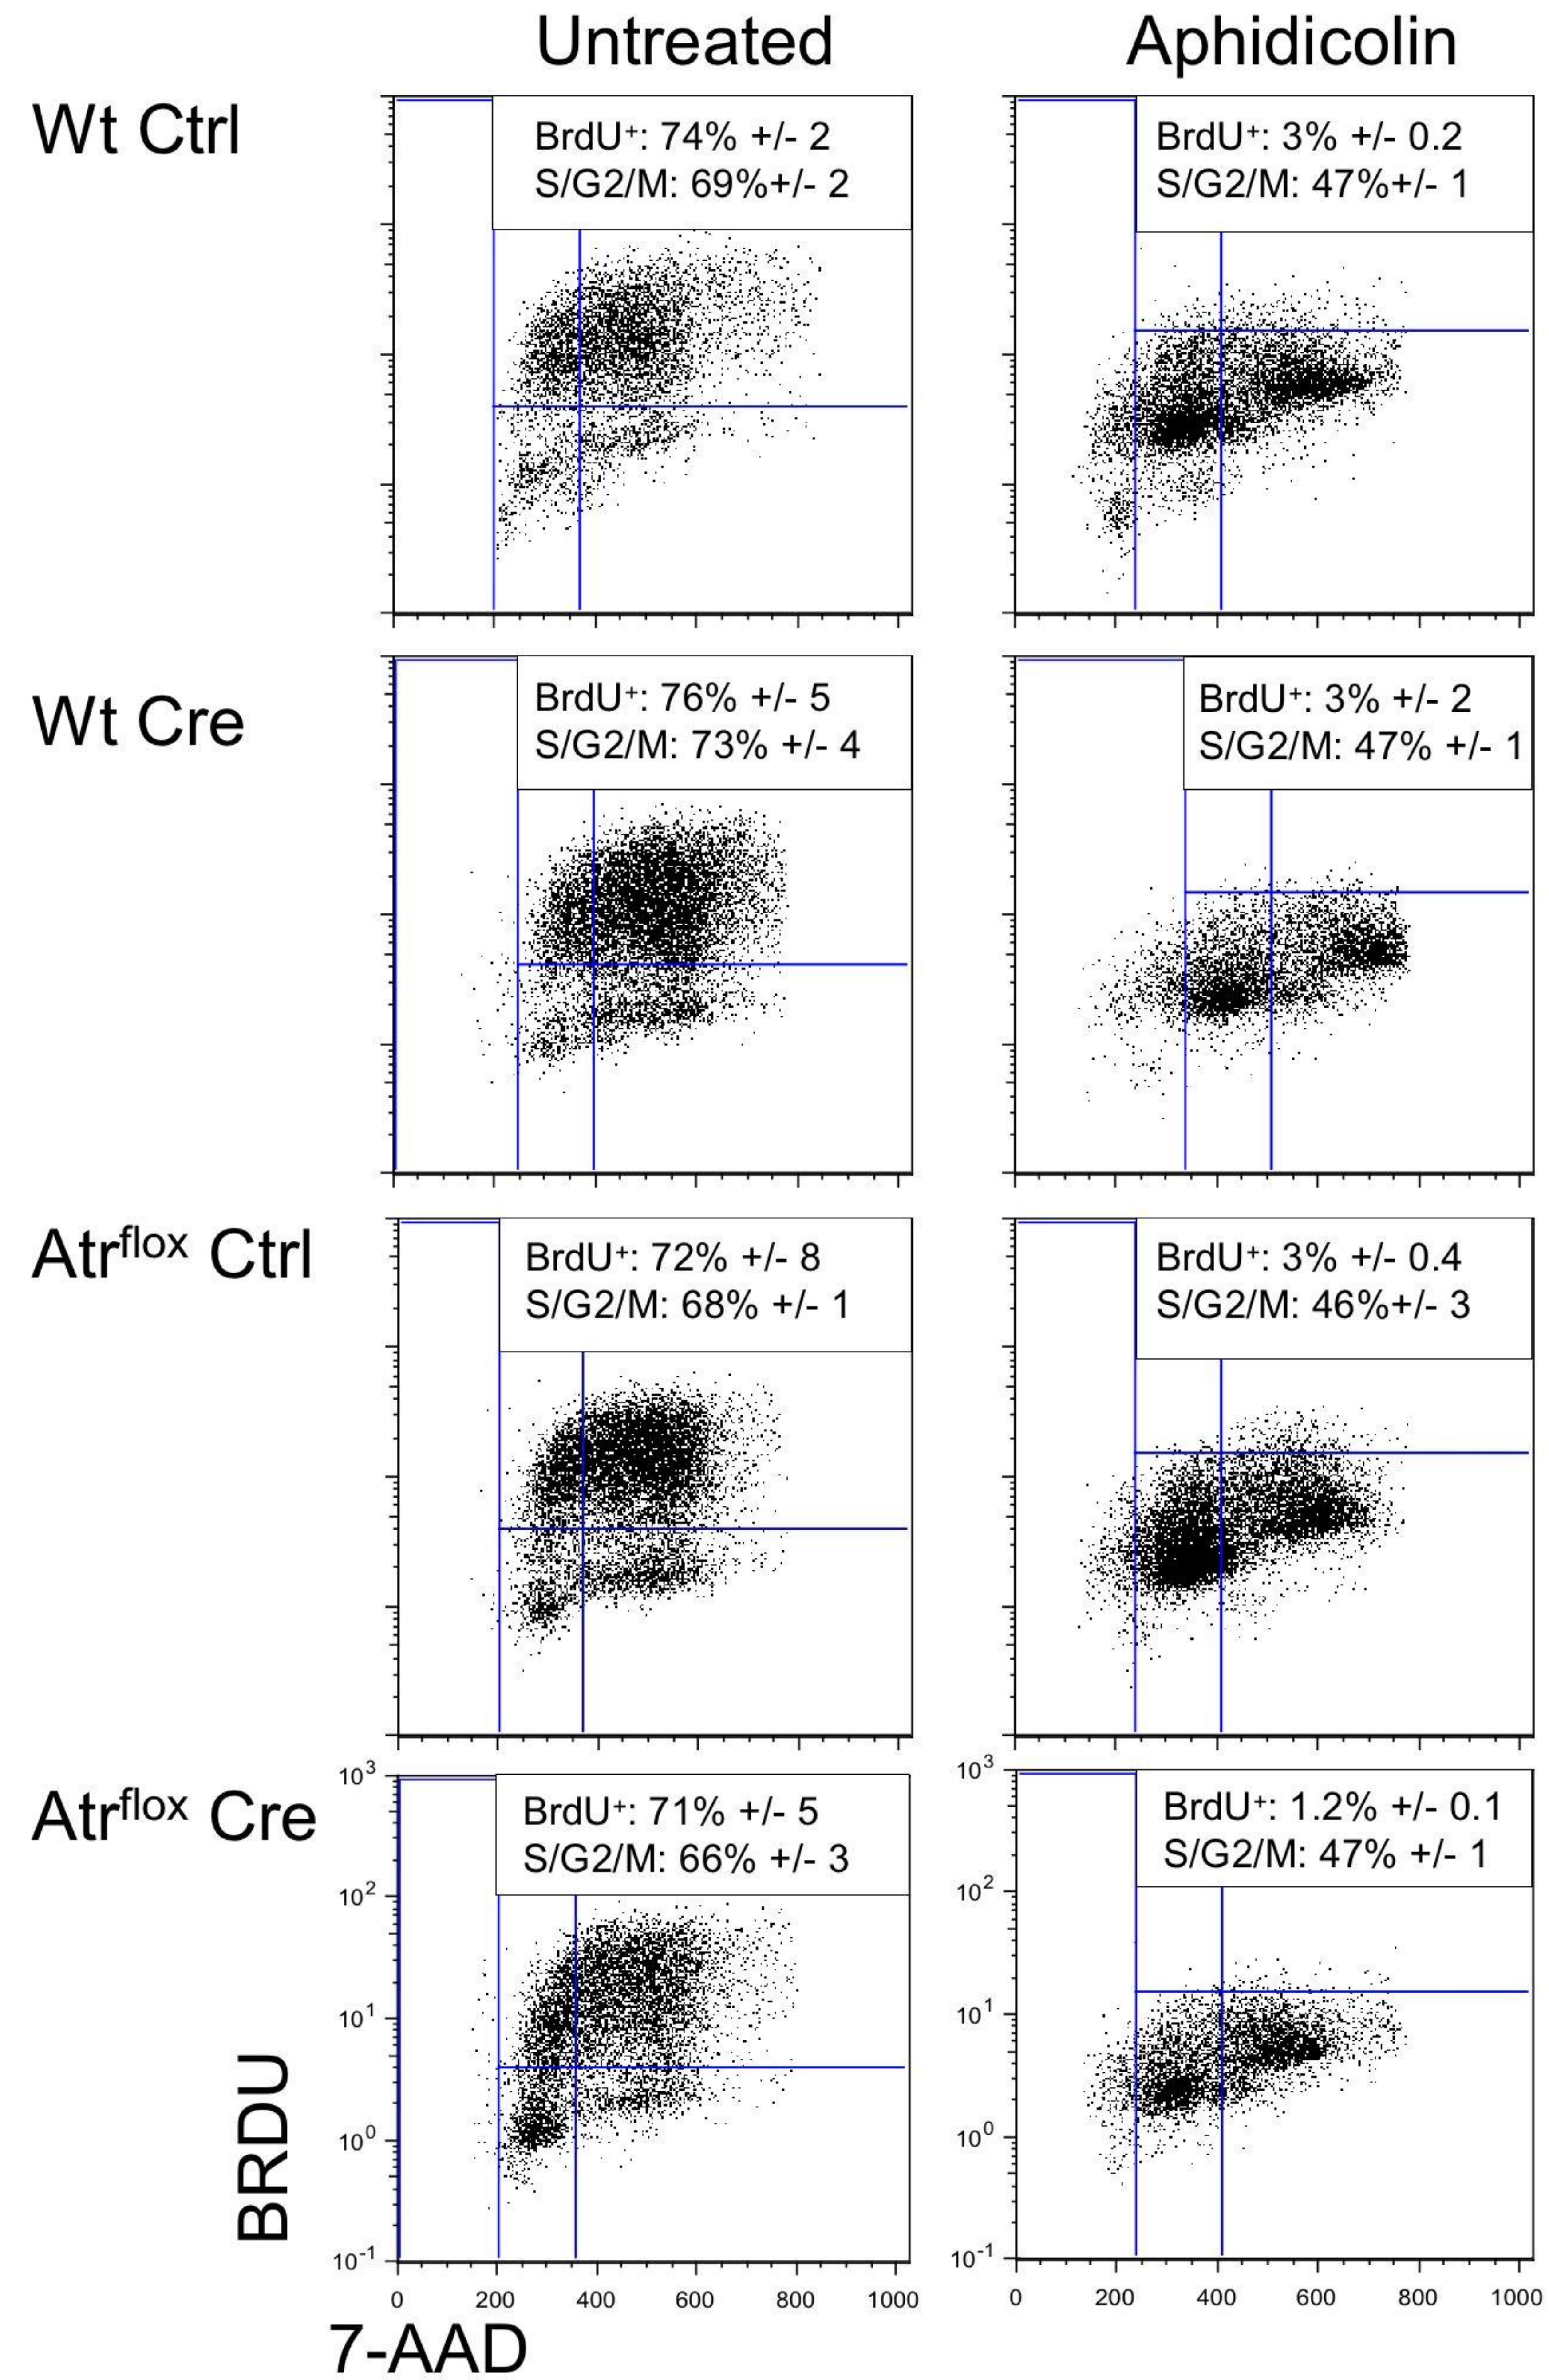

Raulet\_Figure S3

Supplement: NIHMS4767-supplement-SFIG3.pdf [file NIHMS4767-supplement-SFIG3.pdf]

A

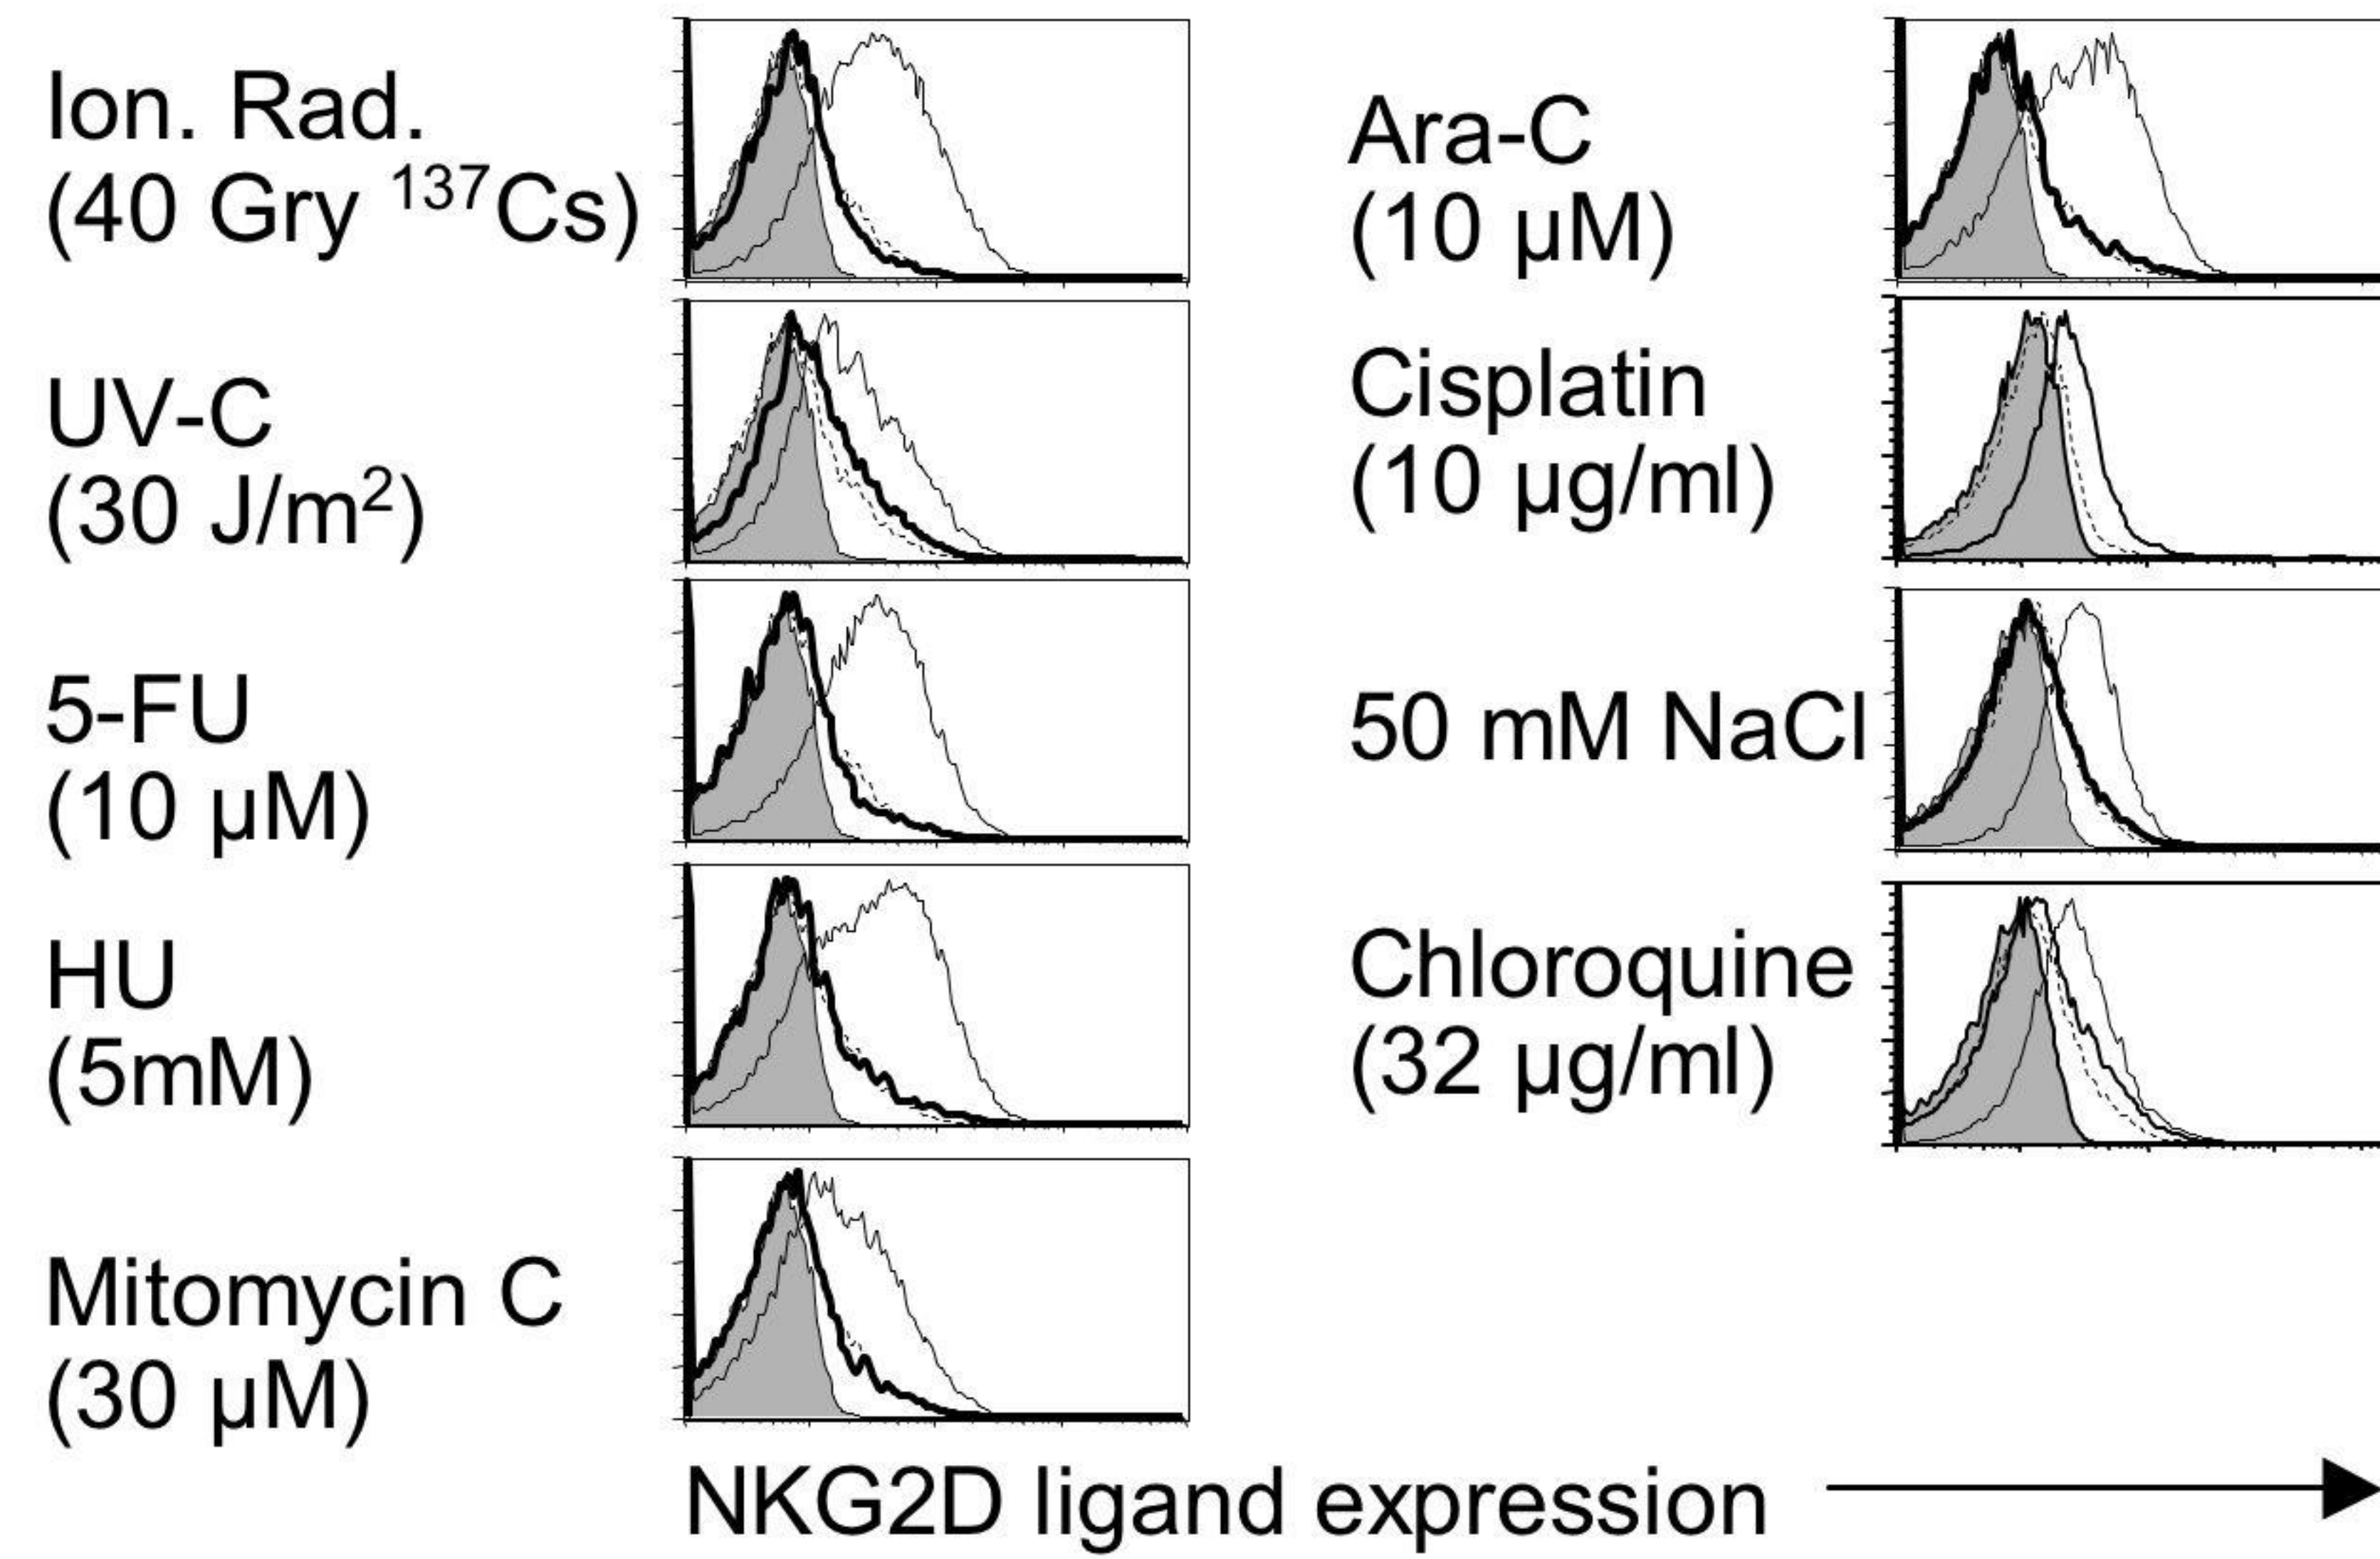

B

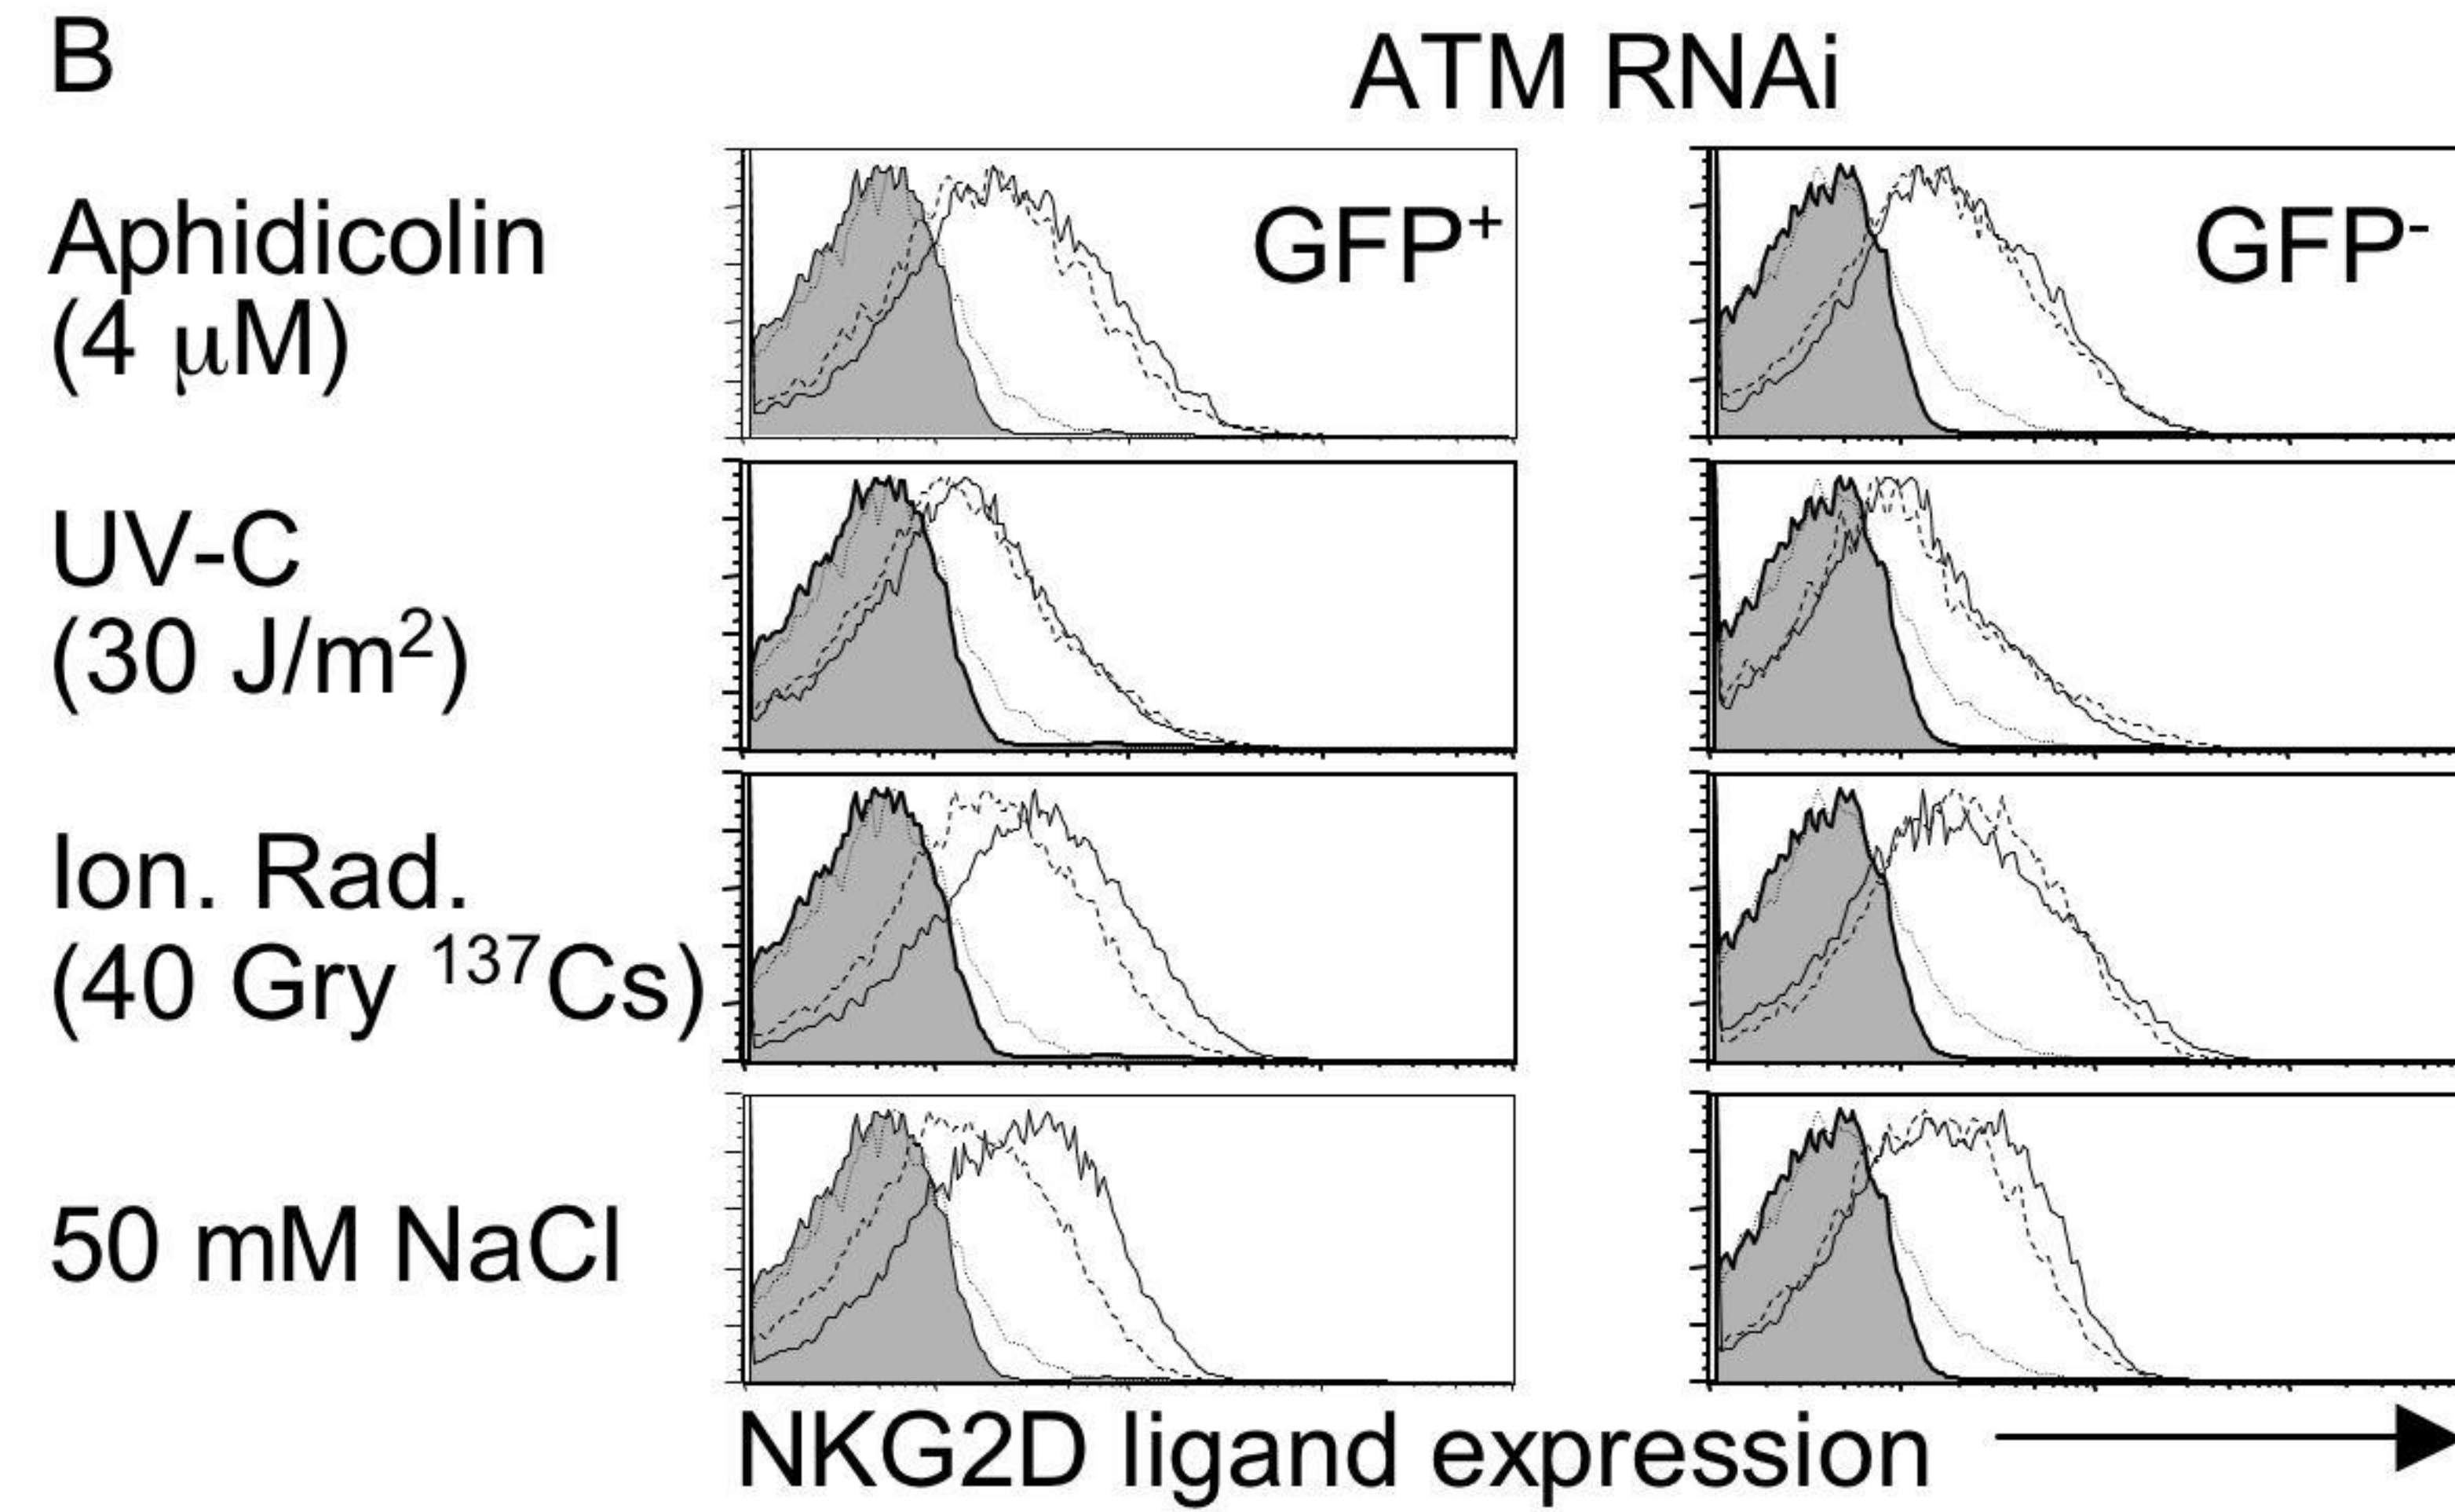

Supplement: NIHMS4767-supplement-SFIG4.pdf [file NIHMS4767-supplement-SFIG4.pdf]
